# Supplementary material for: Si–C attachment points during sol–gel synthesis of organosilicas from 2,8-bis-silylated Tröger's base as building block precursor
Source: Royal Society of Chemistry journal article supplement (doi:10.1039/c1jm10426h), 2011-01-01
Supplement: c1jm10426h.pdf [file c1jm10426h.pdf]

## Si-C attachment points during sol-gel synthesis of organosilicas from 2,8-bis-silylated Tröger's base as building block precursor

Evelyne Poli, Estibaliz Merino, Urbano Díaz, Daniel Brunel and Avelino Corma\*

### Supplementary Information

**Table S1.** Composition the various silicon nucleus species resulting from the signal decompositions of Si-TB-F sample.

|       | Peak | Amplitude | Position (ppm) | Width (ppm) |             |
|-------|------|-----------|----------------|-------------|-------------|
|       | 1    | 80.47     | -61.37         | 6.15        |             |
|       | 2    | 248.16    | -69.91         | 7.96        |             |
|       | 3    | 127.69    | -78.52         | 7.20        |             |
|       | 4    | 53.80     | -92.33         | 7.61        |             |
| Model | 5    | 162.61    | -100.56        | 6.82        | Integration |
|       | 6    | 105.73    | -108.87        | 7.72        |             |

| Peak | %     |
|------|-------|
| 1    | 8.64  |
| 2    | 34.50 |
| 3    | 16.07 |
| 4    | 7.16  |
| 5    | 19.38 |
| 6    | 14.26 |

Sum of T-sites:  
(8.64+34.50+16.07)% = 59.21%

**Table S2.** Composition the various silicon nucleus species resulting from the signal decompositions of Si-TB-A sample.

| Peak | Amplitude | Position (ppm) | Width (ppm) |
|------|-----------|----------------|-------------|
| 1    | 70.98     | -61.52         | 6.56        |
| 2    | 117.10    | -69.83         | 7.02        |
| 3    | 146.41    | -78.39         | 8.04        |
| 4    | 38.21     | -91.79         | 6.24        |
| 5    | 110.18    | -100.65        | 7.26        |
| 6    | 86.95     | -109.22        | 8.11        |

#### Model Integration

| Peak | %     |
|------|-------|
| 1    | 10.06 |
| 2    | 26.86 |
| 3    | 25.42 |
| 4    | 5.15  |
| 5    | 17.27 |
| 6    | 15.24 |

Sum of T-sites:  
 $(10.06+26.86+25.42)\% = 62.34\%$

**Figure S3.**  $^1\text{H}$  NMR spectra of the recovered organics in solution in deuterated methanol after oxidative treatment of S-TB-F sample.

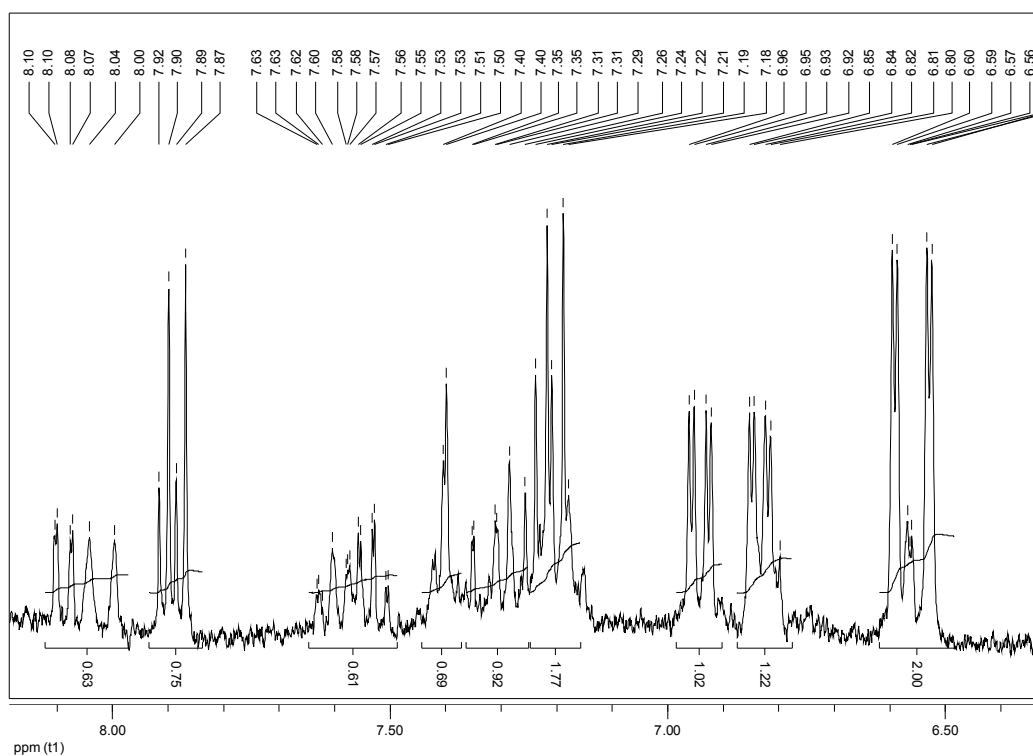

#### S4. Method of calculation of the one-point attachment (O) content

The average value of TB content versus pure silica weight determined from elemental and ATG analyses correspond to the sum of the contents  $\Sigma (O) + (T)$ .

The value of TB content versus pure silica weight obtained by  $^{29}\text{Si}$  OP MAS NMR spectroscopy correspond to the sum of the content  $\Sigma (O) / 2 + (T)$ .

Then the difference,  $\Delta$  between these two values corresponds to the contribution of (O) content according to  $\Delta = (O) / 2$ , then the one-point TB content is equal to  $2 \Delta$ .

For Si-TB-100-F:  $\Delta = 6.30 - 4.95 = 1.35$ , then the (O) contribution is  $2.7 \text{ mmol} / \text{g}^{-1}$  versus the total TB loading of  $6.30 \text{ mmol} / \text{g}^{-1}$  *ie*, 43% of the anchored TB.

For Si-TB-100-A:  $\Delta = 5.80 - 5.20 = 0.6$ , then the (O) contribution is  $1.2 \text{ mmol} / \text{g}^{-1}$  versus the total TB loading of  $5.80 \text{ mmol} / \text{g}^{-1}$ , *ie*, 21 % of the anchored TB.
